# Supplementary material for: Hollow-shell structured porous CoSe2 microspheres encapsulated by MXene nanosheets for advanced lithium storage
Source: Royal Society of Chemistry journal article supplement (doi:10.1039/c9se01271k), 2020-01-01
Supplement: c9se01271k1.pdf [file c9se01271k1.pdf]

# Supporting Information

## Hollow-Shell Structured Porous CoSe<sub>2</sub> Microspheres Encapsulated by MXene Nanosheets for Advanced Lithium Storage

Lin Hong,<sup>1,2</sup> Shunlong Ju,<sup>2</sup> Yunhe Yang,<sup>1</sup> Jiening Zheng,<sup>2</sup> Guanglin Xia,<sup>2</sup> Zhenguo Huang,<sup>3</sup> Xiaoyun Liu\*<sup>1</sup> and Xuebin Yu\*<sup>2</sup>

<sup>1</sup>Key Laboratory of Specially Functional Polymeric Materials and Related Technology, Ministry of Education, East China University of Science and Technology, Shanghai 200237, China

<sup>2</sup>Department of Materials Science, Fudan University, Shanghai 200433, China

<sup>3</sup>School of Civil & Environmental Engineering, University of Technology Sydney, Ultimo, New South Wales 2007, Australia

E-mail: yuxuebin@fudan.edu.cn; liuxiaoyun@ecust.edu.cn

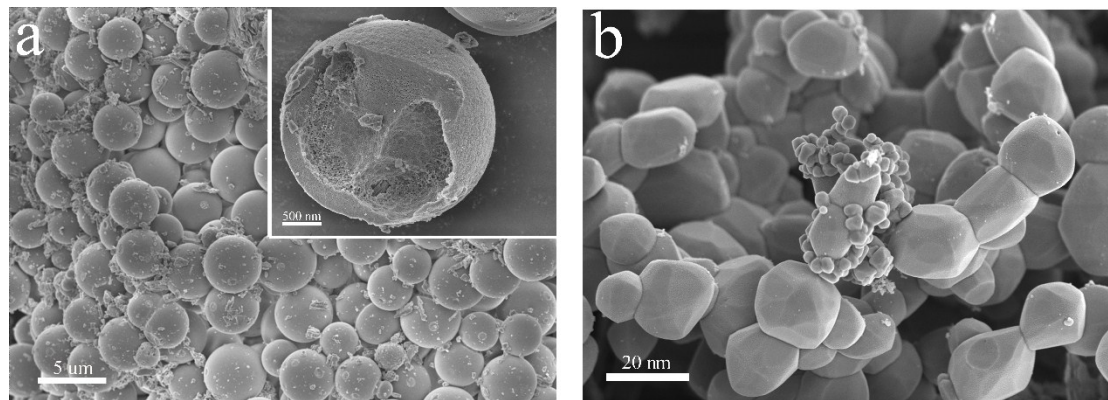

**Figure S1** FESEM images of (a) Co-MOF and (b) pure CoSe<sub>2</sub>.

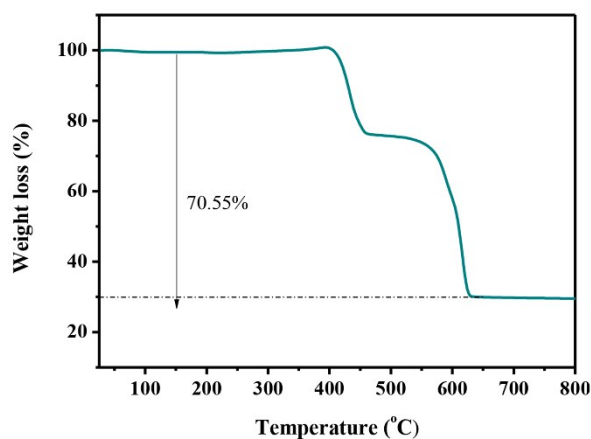

**Figure S2** TGA of CoSe<sub>2</sub> hollow sphere.

The mass loading of CoSe<sub>2</sub> in MOF-derived CoSe<sub>2</sub> hollow sphere was determined by TGA in air atmosphere at a heating rate of 10 °C min<sup>-1</sup> from 25 to 800 °C, as displayed in [Figure S3](#). During the thermal treatment process, the significant mass loss between 400 and 630 °C could be ascribed to the combustion of carbon, and the oxidation of CoSe<sub>2</sub> with conversion of Co<sub>3</sub>O<sub>4</sub> and Se. When the temperature was further increased, no mass loss could be observed probably owing to the complete transformation of CoSe<sub>2</sub> to Co<sub>3</sub>O<sub>4</sub>. Based on the reaction equation:  $3\text{CoSe}_2 (\text{s}) + 2\text{O}_2 (\text{g}) = \text{Co}_3\text{O}_4 (\text{s}) + 6\text{Se} (\text{g})$  and 70.55 wt.% of the original weight lost, the accurate content of CoSe<sub>2</sub> in CoSe<sub>2</sub> hollow sphere was calculated to be 79.55 wt.%.

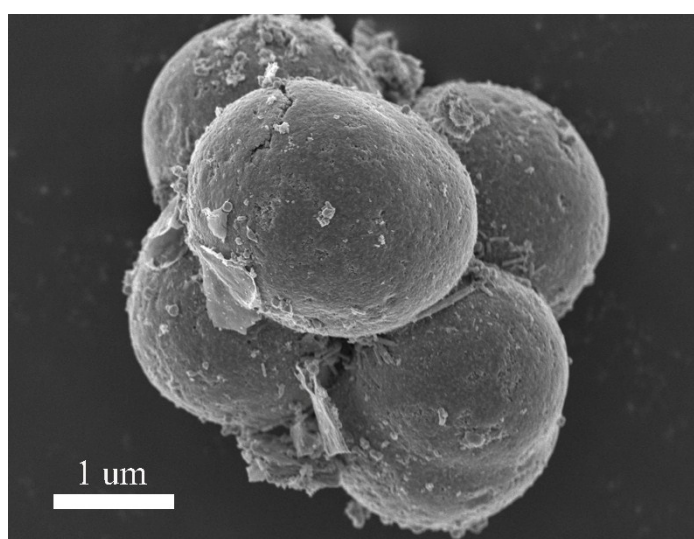

**Figure S3** FESEM images of CoSe<sub>2</sub>@MXene.

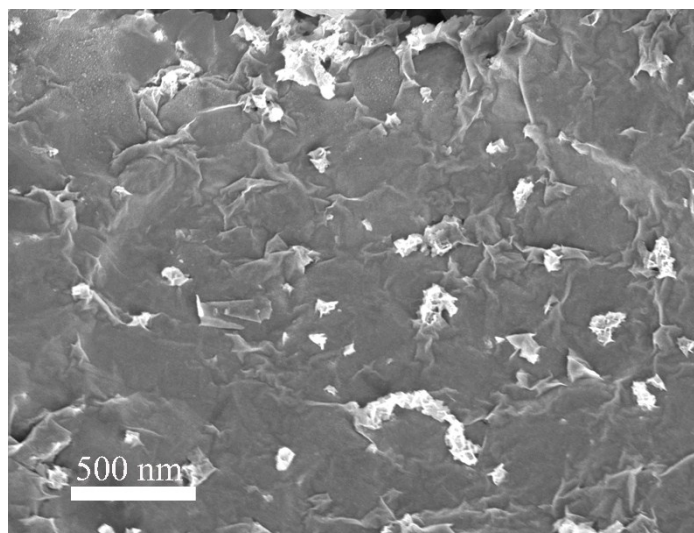

**Figure S4** FESEM images of MXene flakes.

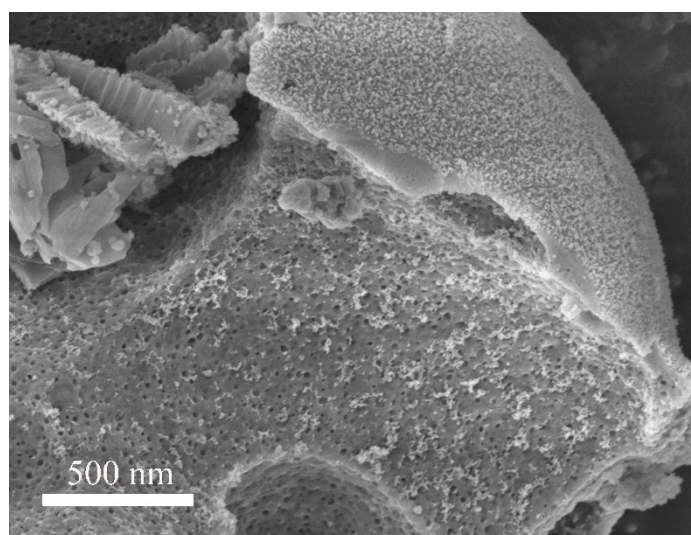

**Figure S5** FESEM images of Co-MOF.

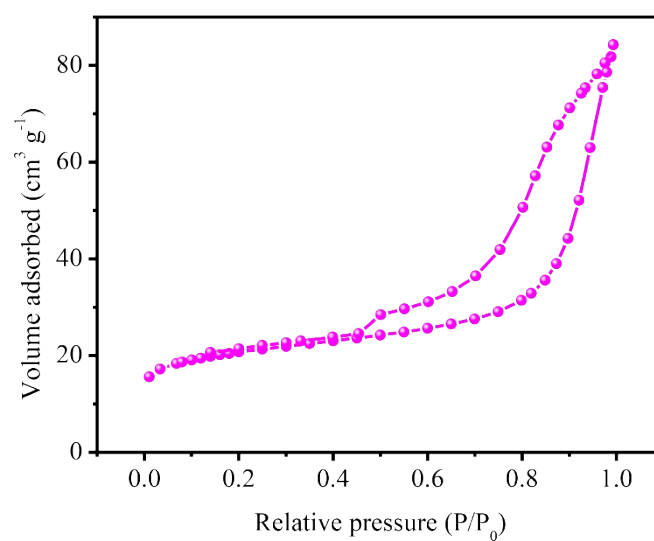

**Figure S6** N<sub>2</sub> adsorption-desorption isotherms of CoSe<sub>2</sub> spheres.

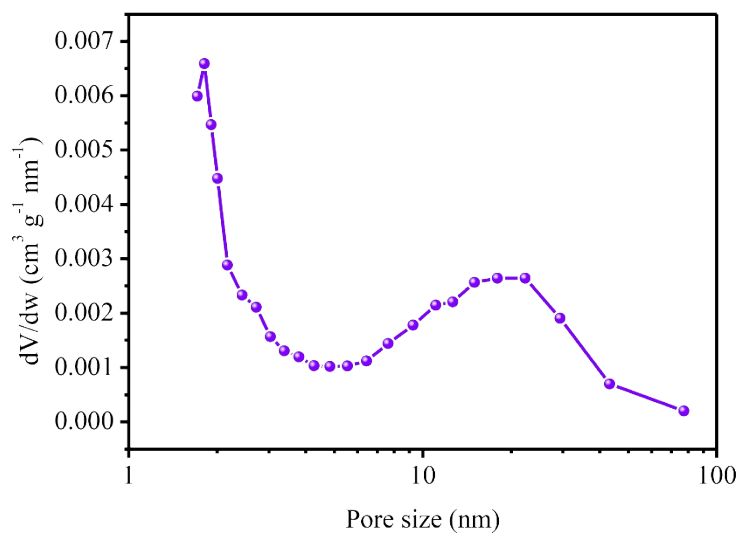

**Figure S7** Pore size distribution of CoSe<sub>2</sub> spheres.

The CoSe<sub>2</sub> spheres possess a specific surface area of 69.19 m<sup>2</sup>/g, and a pore volume of 0.116 cm<sup>3</sup>/g at  $P/P_0 = 0.999$ .

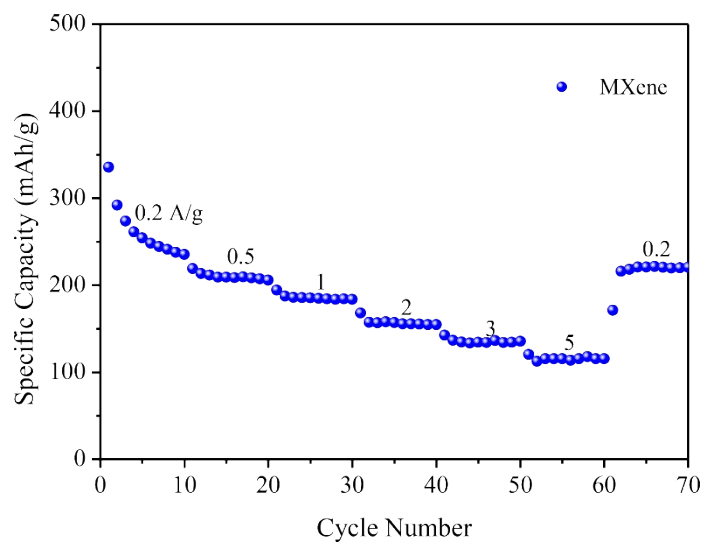

**Figure S8** Rate performance of MXene.

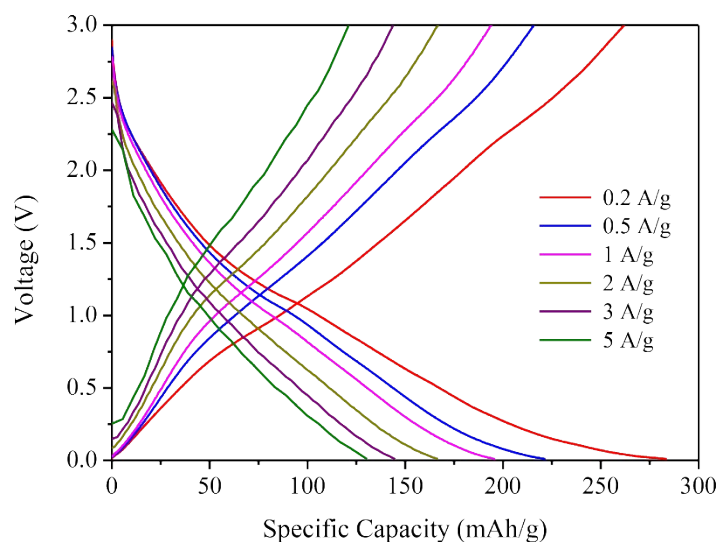

**Figure S9** Galvanostatic charge/discharge curves of MXene at various rates.

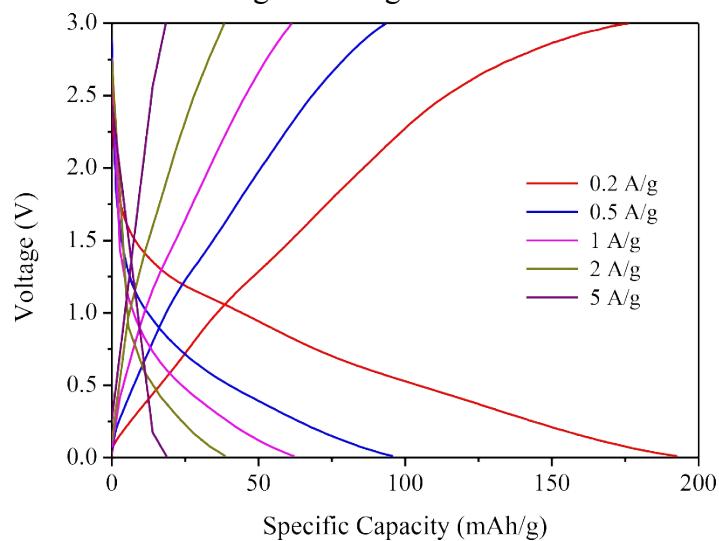

**Figure S10** Galvanostatic charge/discharge curves of pure CoSe<sub>2</sub> at various rates.

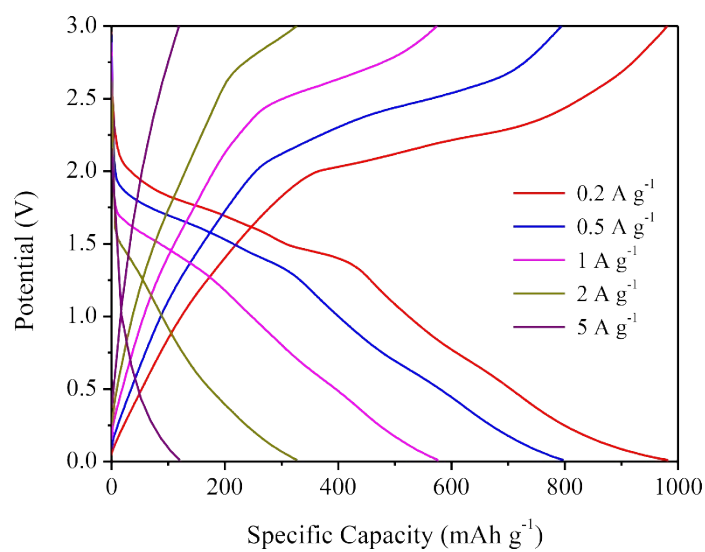

**Figure S11** Galvanostatic charge/discharge curves of CoSe<sub>2</sub> spheres at various rates.

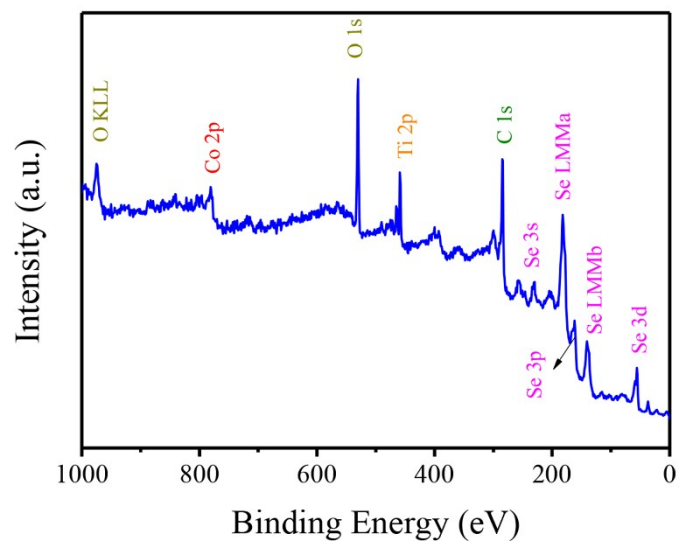

**Figure S12** XPS survey spectrum of CoSe<sub>2</sub>@MXene.

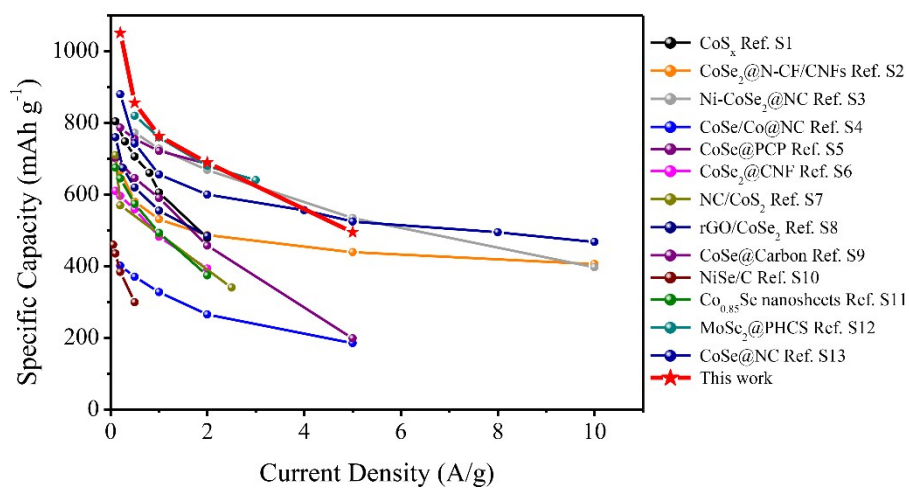

**Figure S13** Comparison of rate capability of the produced CoSe<sub>2</sub>@MXene with other typical anode materials for LIBs.

**Table S1** Summary and comparison of cycling and rate performances of recently reported TMDs for LIBs.

| Materials                        | Cycling Performance             |            |                              | Rate Performance                           |                                | Reference        |
|----------------------------------|---------------------------------|------------|------------------------------|--------------------------------------------|--------------------------------|------------------|
|                                  | Capacity (mAh g <sup>-1</sup> ) | Cycles     | Current (A g <sup>-1</sup> ) | Capacity (mAh g <sup>-1</sup> )            | Current (A g <sup>-1</sup> )   |                  |
| <b>CoSe<sub>2</sub>@MXene</b>    | <b>910</b>                      | <b>100</b> | <b>0.2</b>                   | <b>1051, 856, 763, 669, and 465</b>        | <b>0.2, 0.5, 1, 2, and 5</b>   | <b>This work</b> |
| CoS <sub>x</sub>                 | 1012.1                          | 100        | 0.5                          | 804, 747, 705, 660, 605, and 478           | 0.1, 0.3, 0.5, 0.8, 1, and 2   | 1                |
| CoSe <sub>2</sub> @N-CF/CNTs     | 428                             | 500        | 1                            | 666, 580, 531, 487, 439, and 406           | 0.2, 0.5, 1, 2, 5, and 10      | 2                |
| Ni-CoSe <sub>2</sub> @NC         | 645                             | 300        | 1.5                          | 772, 728, 669, 534, and 397                | 0.5, 1, 2, 5, and 10           | 3                |
| CoSe/Co@NC                       | 630                             | 100        | 0.2                          | 401, 370, 328, 265, and 185                | 0.2, 0.5, 1, 2, and 5          | 4                |
| CoSe@PCP                         | 675                             | 100        | 0.2                          | 401, 370, 328, 265, and 185                | 0.2, 0.5, 1, 2, and 5          | 5                |
| CoSe <sub>2</sub> @CNF           | 1405                            | 300        | 0.2                          | 610, 596, 559, 482, and 393                | 0.1, 0.2, 0.5, 1, and 2        | 6                |
| NC/CoS <sub>2</sub>              | 560                             | 50         | 0.1                          | 710, 570, 490, and 340                     | 0.1, 0.2, 1, and 2.5           | 7                |
| rGO/CoSe <sub>2</sub>            | 1577                            | 200        | 0.2                          | 760, 674, 620, 555, and 484                | 0.1, 0.25, 0.5, 1, and 2       | 8                |
| CoSe@Carbon                      | 860                             | 100        | 0.2                          | 787, 755, 722, and 686                     | 0.2, 0.5, 1, and 2             | 9                |
| NiSe/C                           | 428                             | 50         | 0.1                          | 460, 435, 384, and 299                     | 0.05, 0.1, 0.2, and 0.5        | 10               |
| Co <sub>0.85</sub> Se nanosheets | 516                             | 50         | 0.2                          | 675, 645, 574, 493, and 374                | 0.1, 0.2, 0.5, 1, and 2        | 11               |
| MoSe <sub>2</sub> @PHCs          | 681                             | 100        | 0.5                          | 820, 760, 680, and 640                     | 0.5, 1, 2, and 3               | 12               |
| CoSe@NC                          | 796                             | 100        | 1                            | 880, 742, 656, 600, 556, 525, 495, and 374 | 0.2, 0.5, 1, 2, 4, 5, 8, and 2 | 13               |



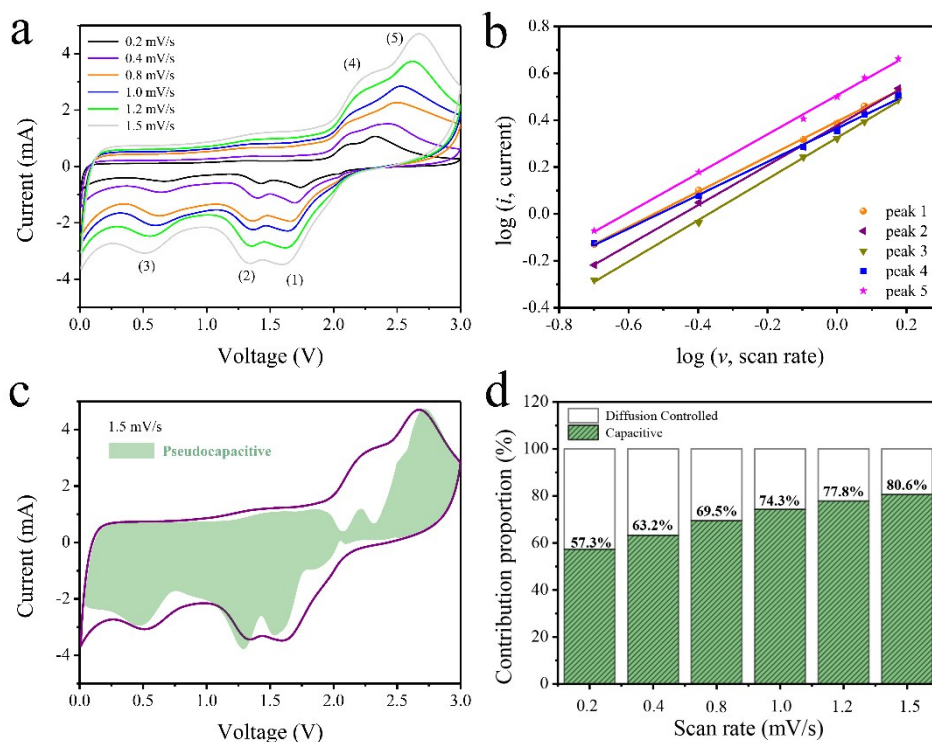

**Figure S14** (a) CV profiles of CoSe<sub>2</sub>@MXene at different scan rates. (b) The plots of  $\log(i)$  vs  $\log(v)$  (peak current:  $i$ , scan rate:  $v$ ), calculated from CV curves. (c) The shaded region shows the CV profile with the pseudocapacitive contribution at a scan rate of 1.5 mV s<sup>-1</sup>. (d) Contribution ratio of pseudocapacitive at different scan rates.

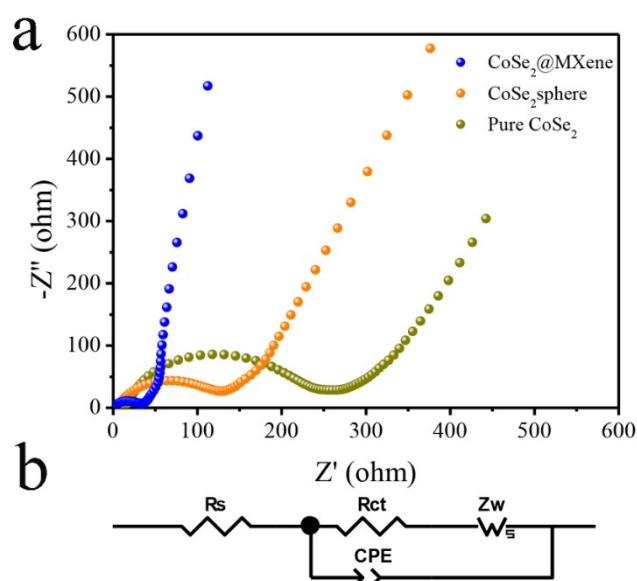

**Figure S15** (a) Nyquist plots of pure CoSe<sub>2</sub>, CoSe<sub>2</sub> sphere and CoSe<sub>2</sub>@MXene



electrodes, (b) equivalent circuit model.

## References

1. Xiao, Y.; Hwang, J.-Y.; Belharouak, I.; Sun, Y.-K., Superior Li/Na-storage capability of a carbon-free hierarchical CoS<sub>x</sub> hollow nanostructure. *Nano Energy* **2017**, *32*, 320-328.
2. Yang, J.; Gao, H.; Men, S.; Shi, Z.; Lin, Z.; Kang, X.; Chen, S., CoSe<sub>2</sub> Nanoparticles Encapsulated by N-Doped Carbon Framework Intertwined with Carbon Nanotubes: High-Performance Dual-Role Anode Materials for Both Li- and Na-Ion Batteries. *Adv Sci* **2018**, *5*, (12), 1800763.
3. Liu, W.; Shao, M.; Zhou, W.; Yuan, B.; Gao, C.; Li, H.; Xu, X.; Chu, H.; Fan, Y.; Zhang, W.; Li, S.; Hui, J.; Fan, D.; Huo, F., Hollow Ni-CoSe<sub>2</sub> Embedded in Nitrogen-Doped Carbon Nanocomposites Derived from Metal-Organic Frameworks for High-Rate Anodes. *ACS Appl Mater Interfaces* **2018**, *10*, (45), 38845-38852.
4. Zhou, Y.; Tian, R.; Duan, H.; Wang, K.; Guo, Y.; Li, H.; Liu, H., CoSe/Co nanoparticles wrapped by in situ grown N-doped graphitic carbon nanosheets as anode material for advanced lithium ion batteries. *Journal of Power Sources* **2018**, *399*, 223-230.
5. Li, J.; Yan, D.; Lu, T.; Yao, Y.; Pan, L., An advanced CoSe embedded within porous carbon polyhedra hybrid for high performance lithium-ion and sodium-ion batteries. *Chemical Engineering Journal* **2017**, *325*, 14-24.
6. Wang, J.; Wang, H.; Cao, D.; Lu, X.; Han, X.; Niu, C., Epitaxial Growth of Urchin-Like CoSe<sub>2</sub> Nanorods from Electrospun Co-Embedded Porous Carbon Nanofibers and Their Superior Lithium Storage Properties. *Particle & Particle Systems Characterization* **2017**, *34*, (10).
7. Wang, Q.; Zou, R.; Xia, W.; Ma, J.; Qiu, B.; Mahmood, A.; Zhao, R.; Yang, Y.; Xia, D.; Xu, Q., Facile Synthesis of Ultrasmall CoS<sub>2</sub> Nanoparticles within Thin N-Doped Porous Carbon Shell for High Performance Lithium-Ion Batteries. *Small* **2015**, *11*, (21), 2511-7.
8. Li, Z.; Xue, H.; Wang, J.; Tang, Y.; Lee, C.-S.; Yang, S., Reduced Graphene

Oxide/Marcasite-Type Cobalt Selenide Nanocrystals as an Anode for Lithium-Ion Batteries with Excellent Cyclic Performance. *ChemElectroChem* **2015**, 2, (11), 1682-1686.

9. Hu, H.; Zhang, J.; Guan, B.; Lou, X. W., Unusual Formation of CoSe@carbon Nanoboxes, which have an Inhomogeneous Shell, for Efficient Lithium Storage. *Angew Chem Int Ed Engl* **2016**, 55, (33), 9514-8.

10. Zhang, Z.; Shi, X.; Yang, X., Synthesis of core-shell NiSe/C nanospheres as anodes for lithium and sodium storage. *Electrochimica Acta* **2016**, 208, 238-243.

11. Zhou, J.; Wang, Y.; Zhang, J.; Chen, T.; Song, H.; Yang, H. Y., Two dimensional layered Co<sub>0.85</sub>Se nanosheets as a high-capacity anode for lithium-ion batteries. *Nanoscale* **2016**, 8, (32), 14992-5000.

12. Yang, X.; Zhang, Z.; Fu, Y.; Li, Q., Porous hollow carbon spheres decorated with molybdenum diselenide nanosheets as anodes for highly reversible lithium and sodium storage. *Nanoscale* **2015**, 7, (22), 10198-203.

13. Liu, J.; Liang, J.; Wang, C.; Ma, J., Electrospun CoSe@N-doped carbon nanofibers with highly capacitive Li storage. *Journal of Energy Chemistry* **2019**, 33, 160-166.
